# Supplementary material for: Quantum Coherent Beating in Polar Disubphthalocyanine-Fullerene Cocrystals for Ultrafast Photothermal Conversion
Source: Research Square preprint supplement (doi:10.21203/rs.3.rs-7288147/v1), 2025-09-23
Supplement: Supplementary file 1 [file 30817e64cbdee31708b3c023.docx]

**Supporting Information**

**Quantum Coherent Beating in Polar Disubphthalocyanine-Fullerene Cocrystals for Ultrafast Photothermal Conversion**

Yong Chen1,7, Yu Zhang2,7, Haozhe Dong3, Nian-Ling Li1, Fei Huang1, Wei Lu1, Hong Yi3, Zihao Xu4, Juan Casado5, Feng Liu6, Xian-Kai Wan*,1, Chuang Zhang*,2, Jingsong You*,1, Cheng Zhang*,1

1Key Laboratory of Green Chemistry and Technology of Ministry of Education, College of Chemistry, Sichuan University, 29 Wangjiang Road, Chengdu 610064, P. R. China.

2Key Laboratory of Photochemistry, Beijing National Laboratory for Molecular Sciences, Institute of Chemistry, Chinese Academy of Sciences, Beijing 100190, P. R. China.

3The Institute for Advanced Studies (IAS), Wuhan University, Wuhan 430072, P. R. China.

4Huairou Research Center, Beijing National Laboratory for Molecular Sciences, Institute of Chemistry, Chinese Academy of Sciences, Beijing 100190, P. R. China.

5Department of Physical Chemistry, University of Malaga, Campus de Teatinos s/n, Málaga, 29071, Spain.

6Future Organic Optoelectronics Research Center, Global Institute of Future Technology, Shanghai Jiao Tong University, Shanghai 200240, P. R. China.

7These authors contributed equally to this work.

**Table of Contents**

[I. General information 2](#_Toc204159926)

[II. Synthesis and thermal stability of **DiSubPcs** 3](#_Toc204159927)

[III. Electrochemical and photophysical properties of SubPcs 5](#_Toc204159928)

[IV. Crystal packings 9](#_Toc204159929)

[V. Theoretical calculations 11](#_Toc204159930)

[VI. Photophysical properties 11](#_Toc204159931)

[VII. Photothermal conversion 12](#_Toc204159932)

[VIII. References 13](#_Toc204159933)

[IX. 1H and 13C NMR spectra 14](#_Toc204159934)

## General information

All commercially available reagents were used without further purification unless otherwise noted. All the reactions dealing with air- or moisture-sensitive compounds were carried out in a dry reaction vessel under a positive pressure of nitrogen.

NMR spectra were recorded on an Agilent 400-MR DD2 spectrometer. The 1H NMR (400 MHz) chemical shifts were measured relative to CDCl3 (CDCl3: *δ* = 7.26 ppm). The 13C NMR (100 MHz) chemical shifts were given using CDCl3 as the internal standard (CDCl3: δ = 77.16 ppm). Matrix-assisted laser desorption/ionization time of flight mass spectra (MALDI-TOF-MS) were collected with a Shimadzu AXIMA Performance. UV-vis-NIR absorption spectra were recorded by SHIMADZU UV-3600. Emission spectra were obtained using an Edinburgh Instruments FLS920 Fluorimeter. PL lifetimes were acquired using the Fluorimeter pulsed xenon flash-lamp, Xe900, of 0.4 W and Picoquant PLS-λ nanosecond LED diodes. X-ray single-crystal diffraction data were collected on an Agilent Technologies Gemini single-crystal diffractometer. Thermogravimetric analysis (TGA) was carried out using METTLER TOLEDO TGA/DSC2 at a rate of 10 °C/min under nitrogen atmosphere. Cyclic voltammogram (CV) was performed on LK2005A with a solution of tetrabutylammonium hexafluorophosphate (Bu4NPF6, 0.1 M) in CH2Cl2 as electrolyte and ferrocene/ferrocenium (Fc/Fc+) as standard. Three-electrode system (Ag/Ag+, platinum wire and glassy carbon electrode as reference, counter, and work electrode, respectively) was used in the CV measurement. All potentials were corrected against Fc/Fc+. CV was measured with a scan rate of 100 mV/s. Theoretical calculations were carried out using Gaussian 09 software. The FMO distributions were visualized using Gaussview 5.0 software. The ground state structures were optimized by density functional theory (DFT) at B3LYP/6-31G* level. To evaluate the photothermal conversion performance, the light source we used is a laser of 550 nm (0.5 W cm−2) and the system temperature was monitored and recorded by FLIR E6-XT Infrared Camera.

## Synthesis and thermal stability of DiSubPcs

**
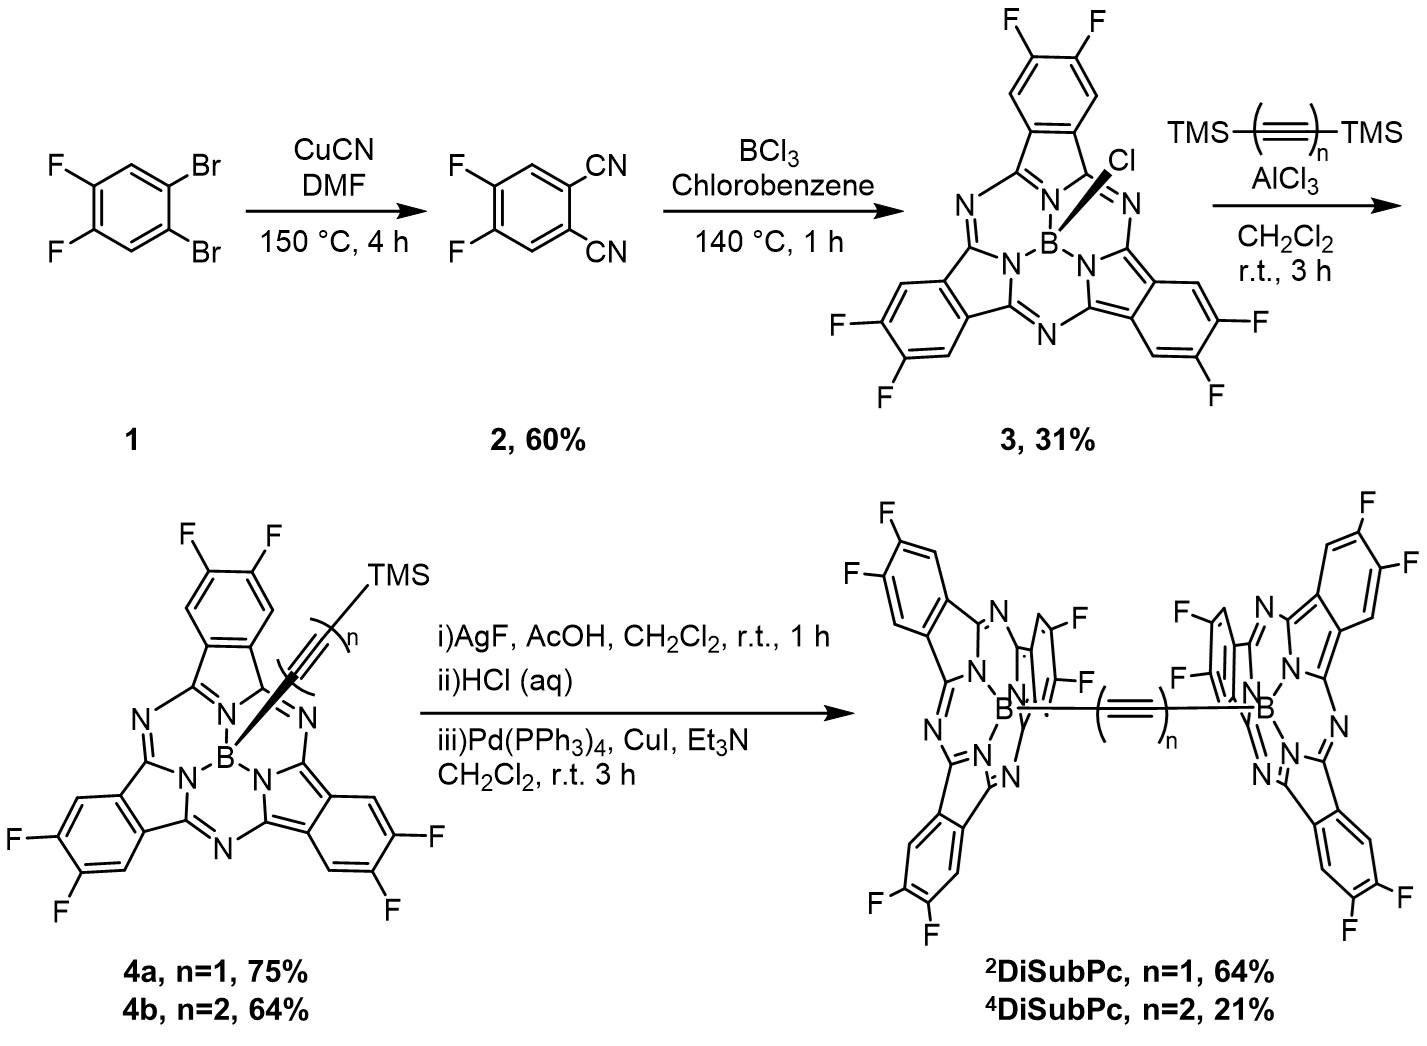
**

**Scheme S1.** Synthesis routes of **DiSubPcs.**

**Preparation of the 4a and 4b**

1,2-Dibromo-4,5-difluorobenzene **1** were obtained from commercial suppliers and used without further purification, **2-4** were prepared according to the literature1. The 1H NMR and 13C NMR data were in accordance with the reported data.

**Preparation of the DiSubPcs**

**
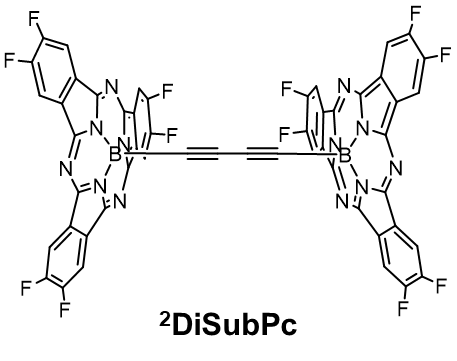
**

**4a** (600 mg, 1 mmol) was dissolved in a solution of CH2Cl2 (50 mL) and AcOH (5 mL, 0.7 M in CH2Cl2), and then AgF (1.3 g, 10 mmol) was added. The mixture was allowed to stir for 60 min, and then aqueous HCl (100 mL, 0.1 M) was added. The reaction mixture was vigorously stirred and extracted with CH2Cl2, and the combined organic phases was dried over Na2SO4 and filtered. The volume was concentrated to 50 mL, then Pd(PPh3)2Cl2 (72 mg, 0.1 mmol) and CuI (38 mg, 0.2 mmol) was added, and Et3N (5 mL) was injected to the system. The mixture was stirred for 4 h, filtered through a celite pad and washed with CH2Cl2, and concentrated under vacuum. The residue was chromatographed on silica gel with PE/CH2Cl2 = 1/1 (*v*/*v*) to provide the corresponding product **2DiSubPc** as red solid (64% yield). 1H NMR (400 MHz, CDCl3): δ = 8.42 (t, *J* = 8.0 Hz, 2H), 13C NMR (100 MHz, CDCl3): δ = 153.98, 153.81, 151.42, 151.26, 149.40, 127.01, 110.40, 29.85. MS (MALDI-TOF): calcd for C52H12B2F12N12: 1054.1302, found: 1054.1840.


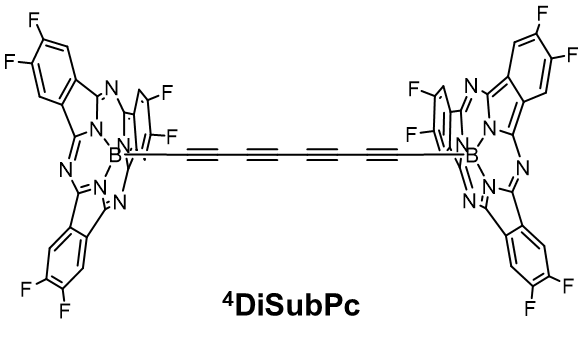


**4DiSubPc** was synthesized according the same route with the yield of 21%. 1H NMR (400 MHz, CDCl3): δ = 8.53 (t, *J* = 8.0 Hz, 2H), 13C NMR (100 MHz, CDCl3): δ = 154.10, 153.94, 151.54, 151.38, 149.63, 127.11, 110.56, 61.10, 60.82, MS (MALDI-TOF): calcd for C56H13B2F12N12+: [M+H]+, 1103.1375, found: 1103.0451.

**Thermal stability**

**
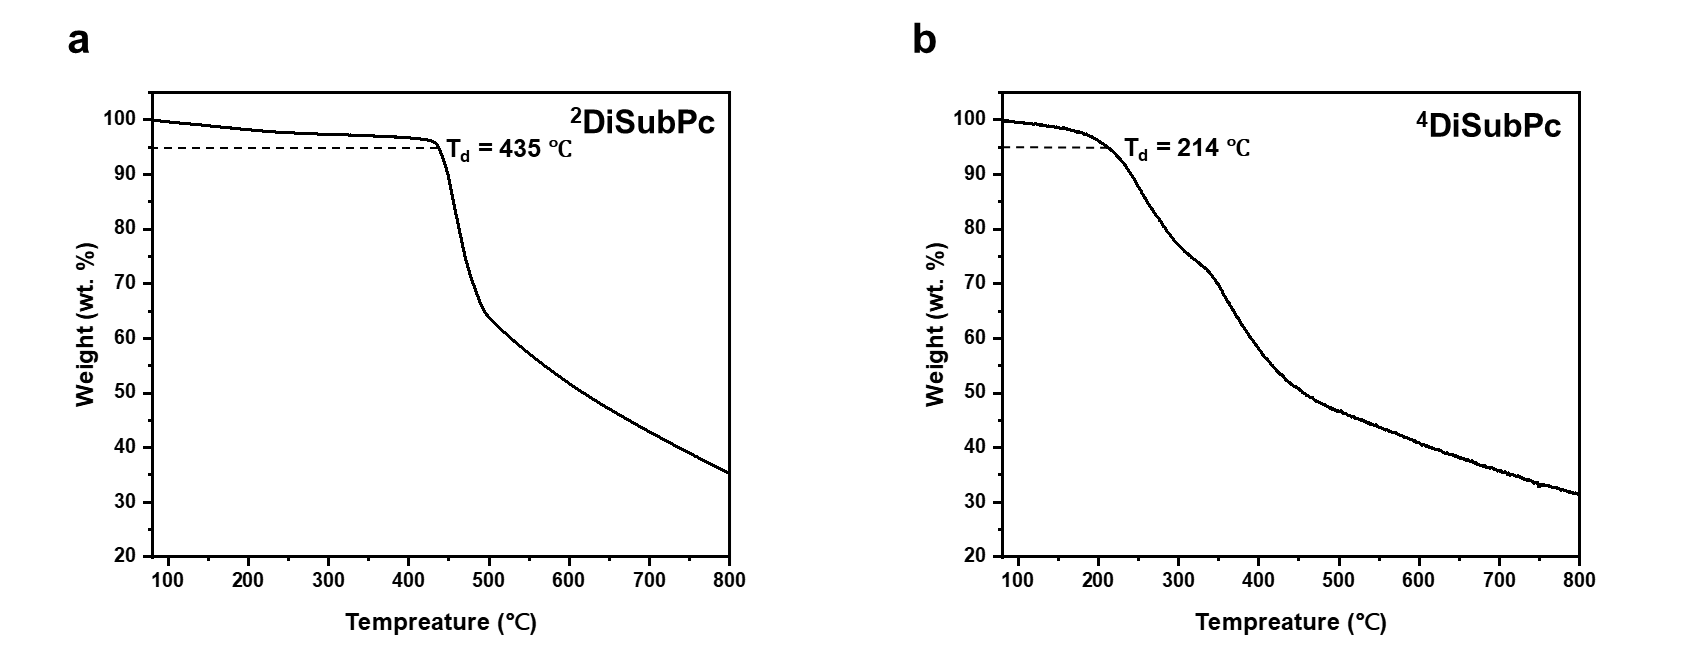
**

**Figure S1.** Thermal gravimetric analysis (TGA) curves of compounds a) **2DiSubPc**, b) **4DiSubPc**.

## Electrochemical and photophysical properties of SubPcs


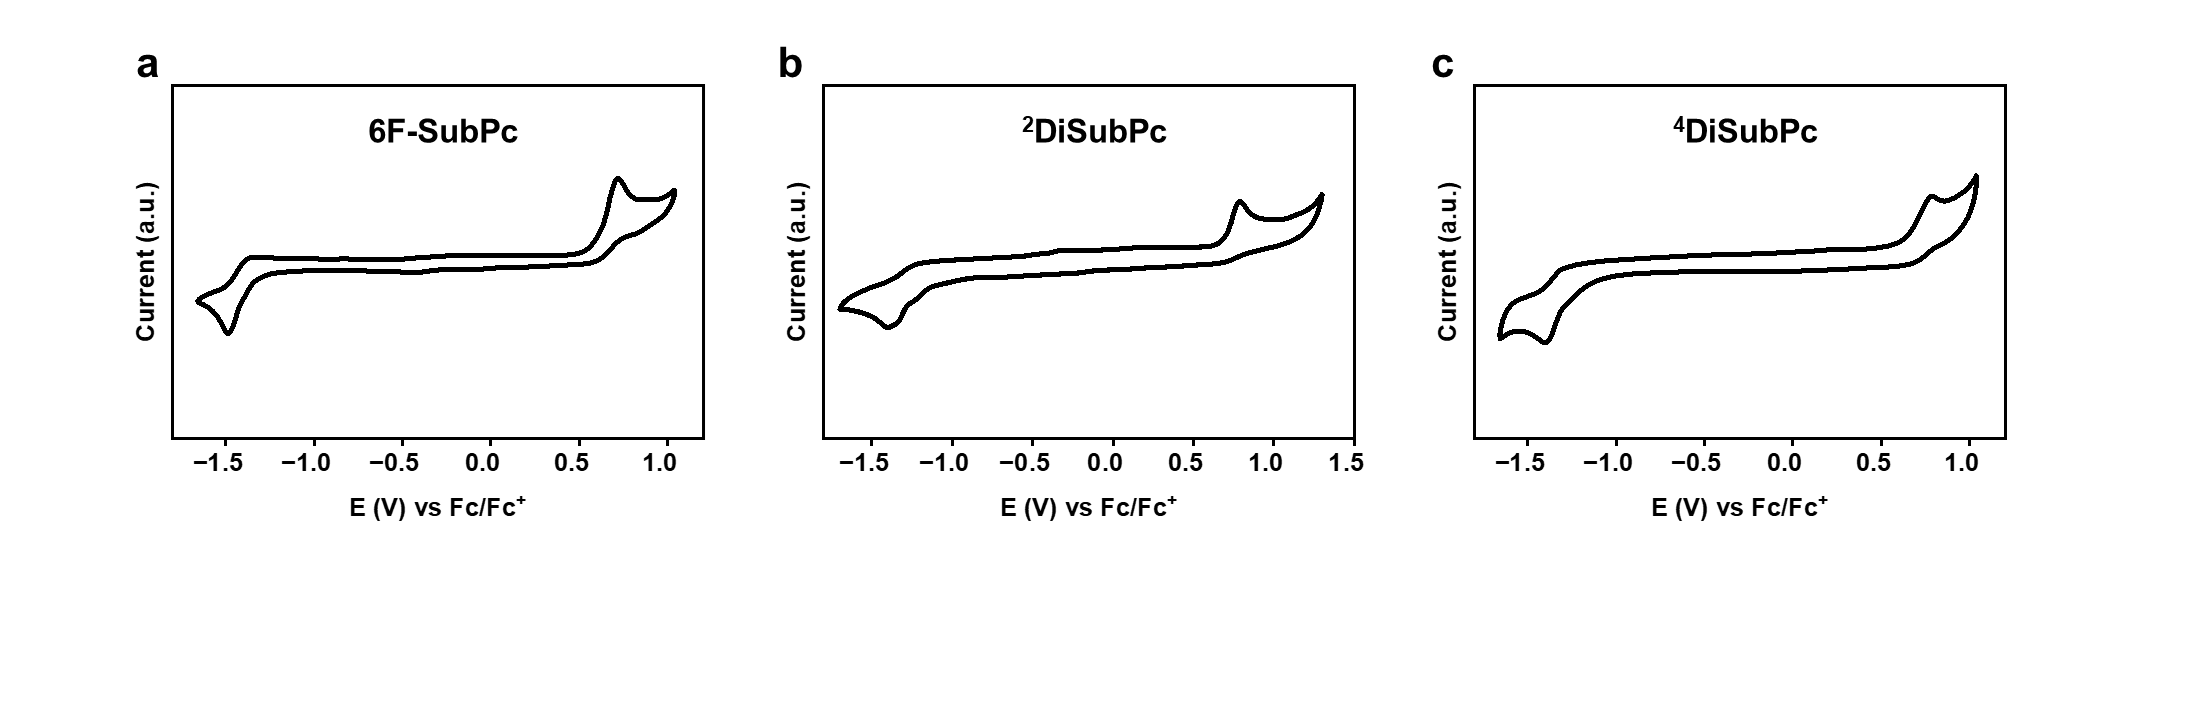


**Figure S2.** CV of a) **6F-SubPc**, b) **2DiSubPc** and c) **4DiSubPc** in dry CH2Cl2 (1.0×10-3 M) containing 0.1 M Bu4NPF6.

**Table S1.** Photophysical and electrochemical properties of SubPcs through UV/Vis/NIR absorption spectra in toluene and CVs.

| Compounds | λmax[a]  [nm] | *E*gabs [b]  [eV] | HOMO[c]  [eV] | LUMO[c]  [eV] | *E*gCV[d]  [eV] |
| --- | --- | --- | --- | --- | --- |
| **6F-SubPc** | 563 | 2.25 | -5.70 | -2.93 | 2.77 |
| **2DiSubPc** | 569 | 2.25 | -5.65 | -2.93 | 2.67 |
| **4DiSubPc** | 574 | 2.25 | -5.70 | -2.98 | 2.72 |

[a] Absorption maxima in toluene (10 μM). [b] Optical bandgaps were calculated according to *E*g = 1240/λonset, where λonset is the onset value of the absorption spectrum in the long wavelength region. [c] From CVs measured in CH2Cl2 (1.0×10-3 M). The HOMO and LUMO energy levels are adjusted according to the redox half potential of Fc/Fc+ and estimated according to the formula: *E*HOMO (eV) = - (4.8 + *E*ox – *E*(Fc/Fc+)1/2), *E*LUMO (eV) = - (4.8 + *E*red - *E*(Fc/Fc+)1/2). [d] Estimated according to the formula: *E*g (eV) = *E*LUMO - *E*HOMO.

**Absorption titrations**


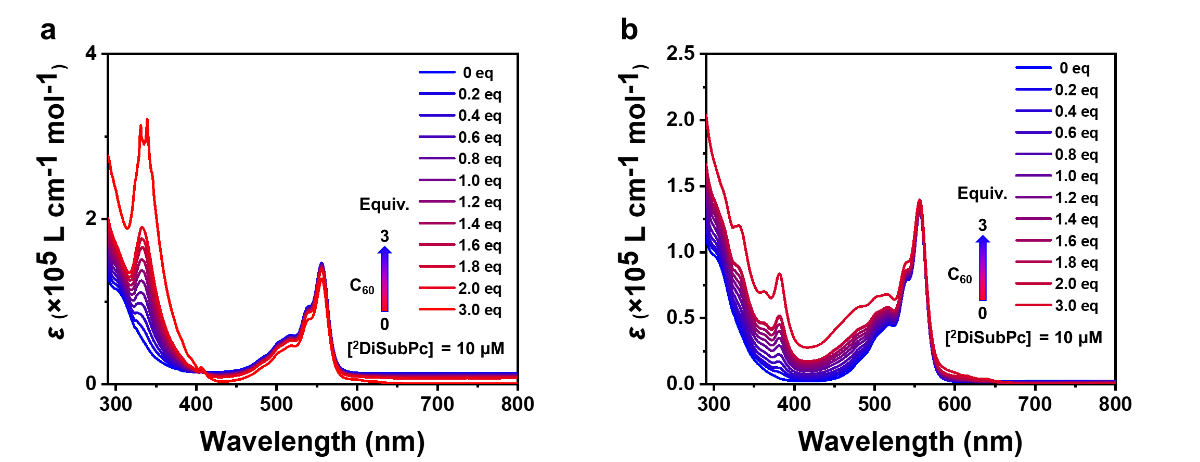


**Figure S3.** The changes of the UV-Vis-NIR spectra of **2DiSubPc** (10 μM in toluene) with the addition of a) C60 and b) C70 from 0 to 3.0 equiv.

**Binding constant based on fluorescence titrations between DiSubPcs and both C60 and C70**

**
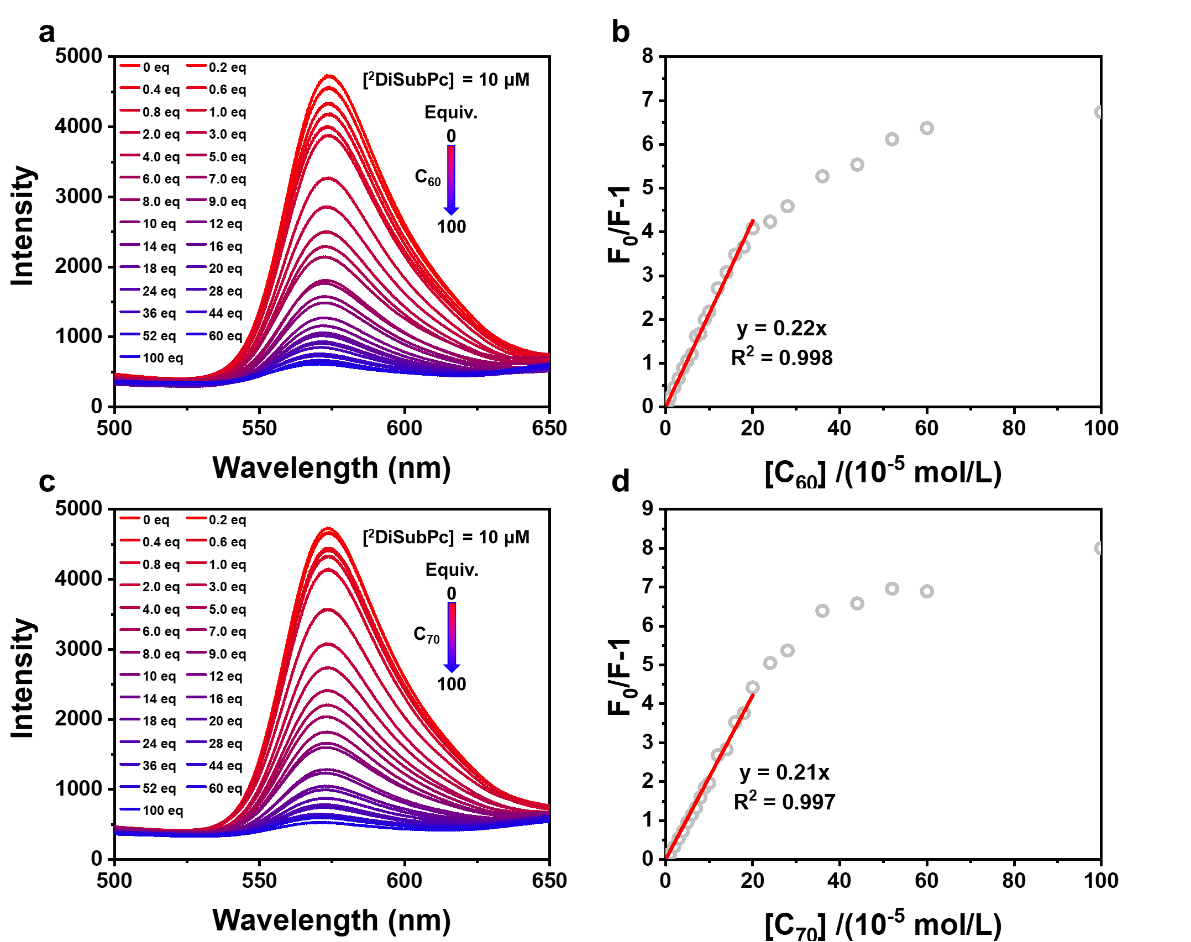
**

**Figure S4.** Changes in the PL intensity of **2DiSubPc** (10 μM in toluene) upon the addition of a) C60 and c) C70 from 0 to 100 equiv. b, d) The corresponding intensity changes of PL at 573 nm (black dots) employed for linear fitting, with the fitting curve displayed in red (0-20 equiv.).


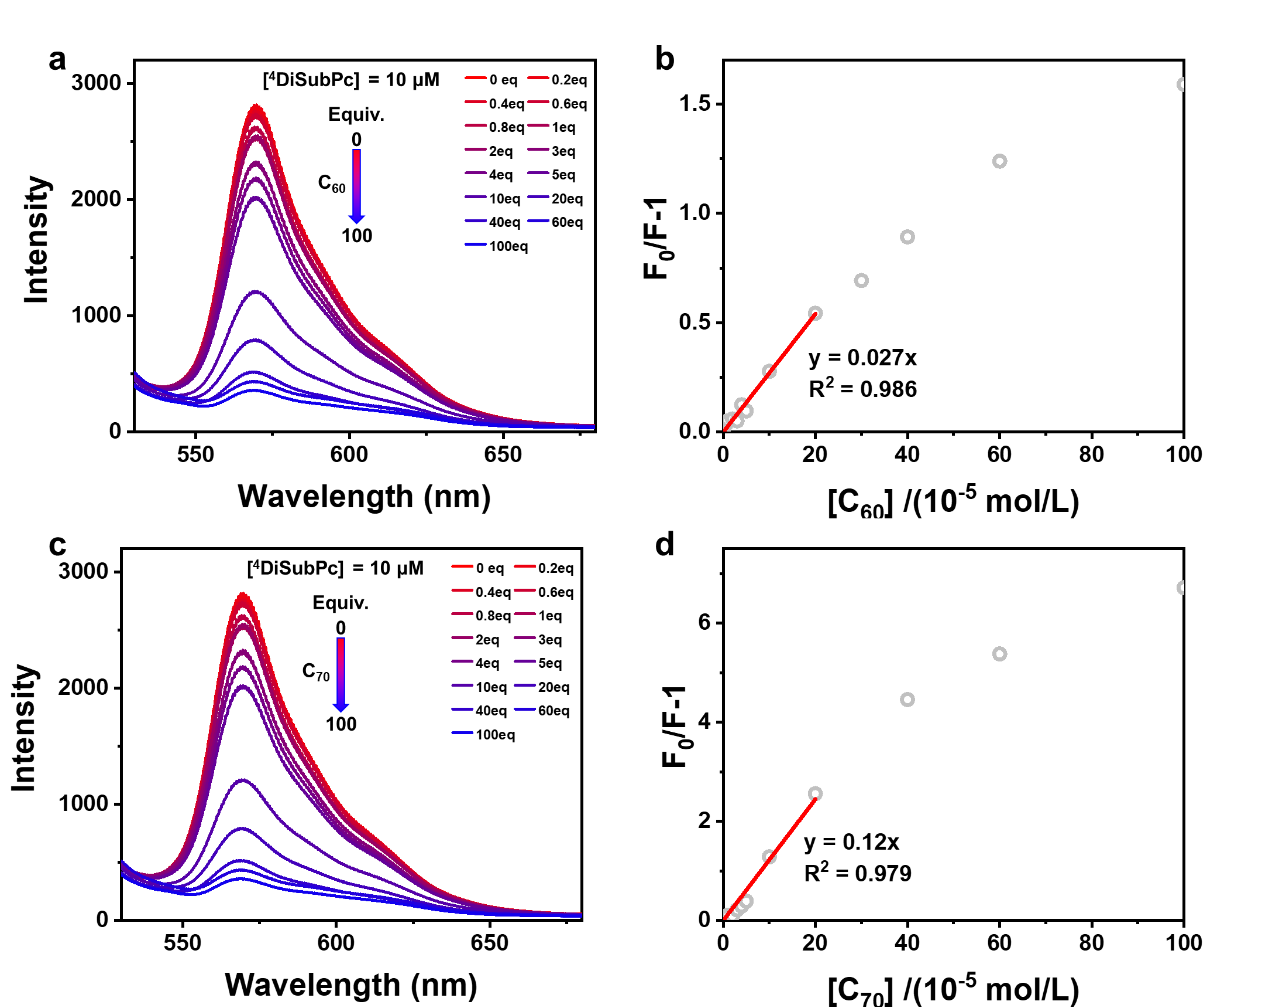


**Figure S5.** Changes in the PL intensity of **4DiSubPc** (10 μM in toluene) upon the addition of a) C60 and c) C70 from 0 to 100 equiv. b, d) The corresponding intensity changes of PL at 573 nm (black dots) employed for linear fitting, with the fitting curve displayed in red (0-20 equiv.).


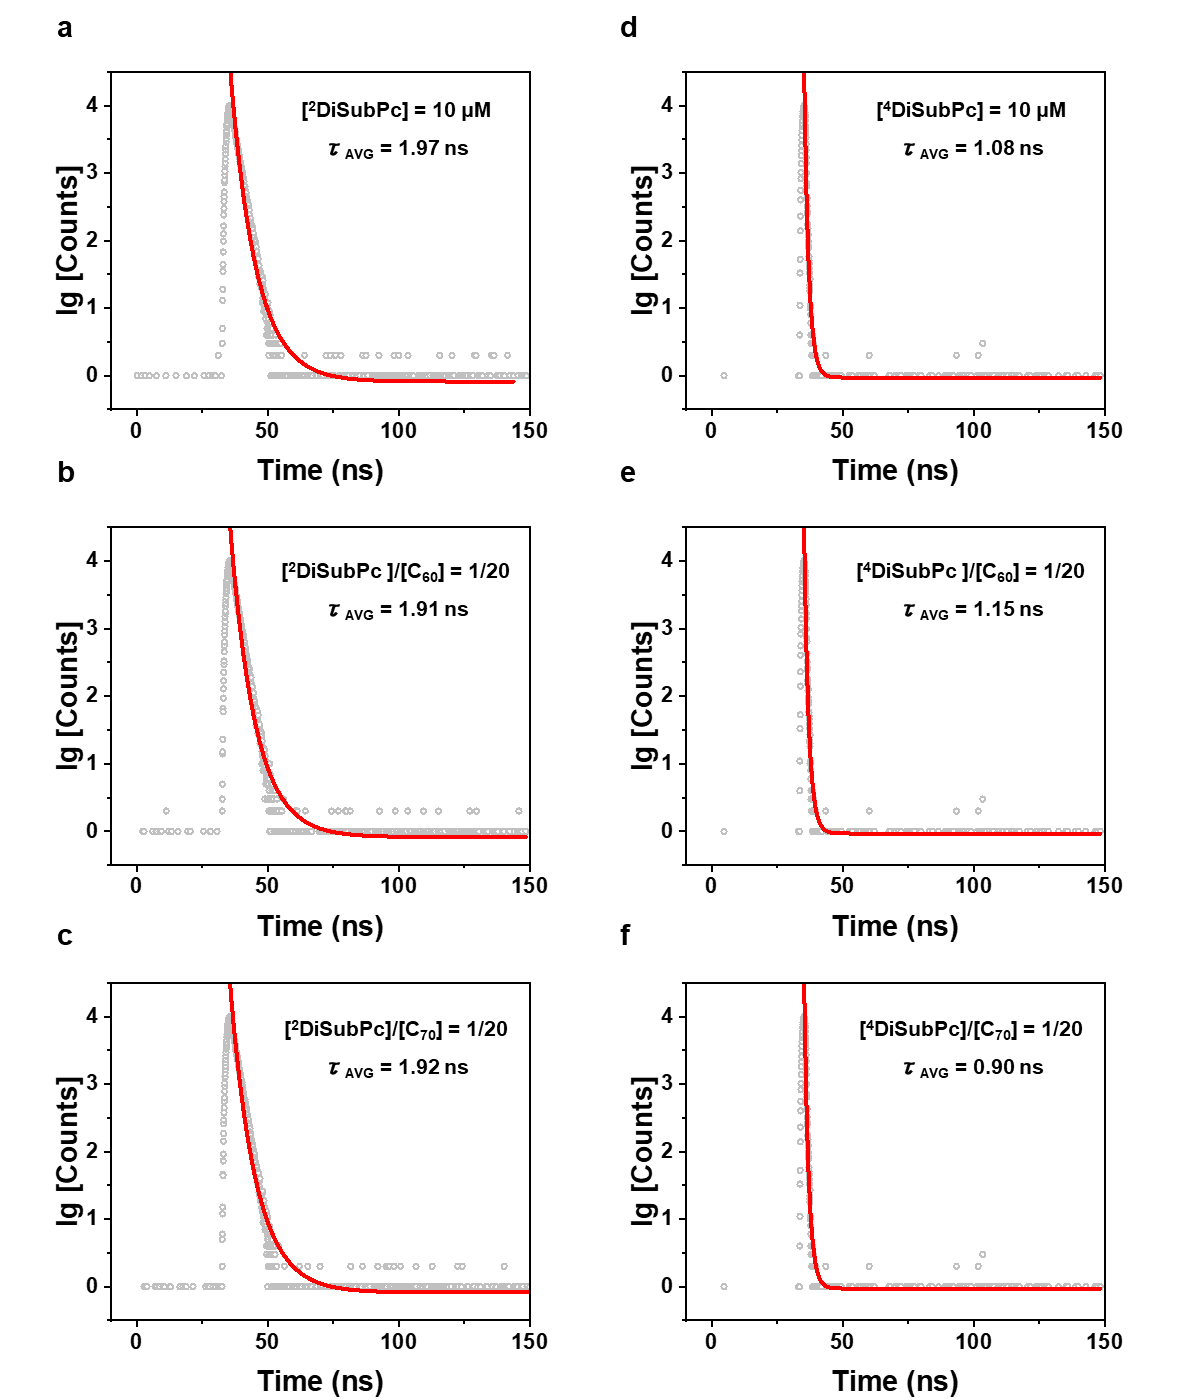


**Figure S6.** a–c) The fluorescence lifetime of **2DiSubPc** (10.0 µM in Toluene) was measured a) without and with the addition of 20 equivalents of either b) C60 or c) C70. d–f) The fluorescence lifetime of **4DiSubPc** (10.0 µM in Toluene) was measured d) without and with the addition of 20 equivalents of either e) C60 or f) C70. The fitted results are shown in red curves.

As showing in figure S4, the addition of fullerenes leads to a gradual quenching of the PL. In general terms, dynamic quenching (quenching agents and fluorophores collide) and static quenching (quenching agents and fluorophores form the non-fluorescent complex) are the two main causes of fluorescence quenching. The combination quenching effect can be described follows Stern-Volmer equation:

F0/F = (1+KD[Q]) (1+KB[Q]) = 1+ (KD+KB) [Q]+KDKB[Q]2

where F0 and F are the fluorescent intensity of the fluorophores **DiSubPcs** without and with quenching agent fullerene, KD is the dynamic quenching constant, [Q] is the concentration of fullerene, KB is the bimolecular binding constant. Considering the low concentration of [Q], [Q]2 is small enough to be ignored. Since dynamic quenching always leads to changes in fluorescence lifetime, we tested the fluorescence lifetime of **DiSubPcs** solution in toluene before and after adding fullerene. Based on the almost identical fluorescence lifetimes, we judged that not dynamic quenching but static quenching leads to the fluorescence quenching, so the above equation could be estimated as:

F0/F ≈ 1+KB[Q]

Therefore, the slope of the above equation, gives the value of the binding constant between **2DiSubPc** and C60 (C70).

## Crystal packings


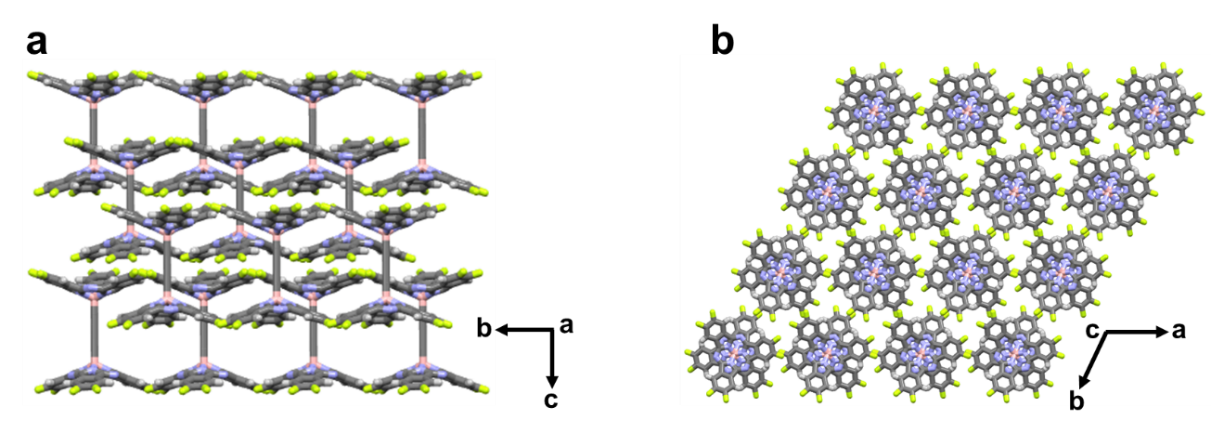


**Figure S7.** The view from a) a-axis and b) c-axis of **2DiSubPc** single crystal.

**
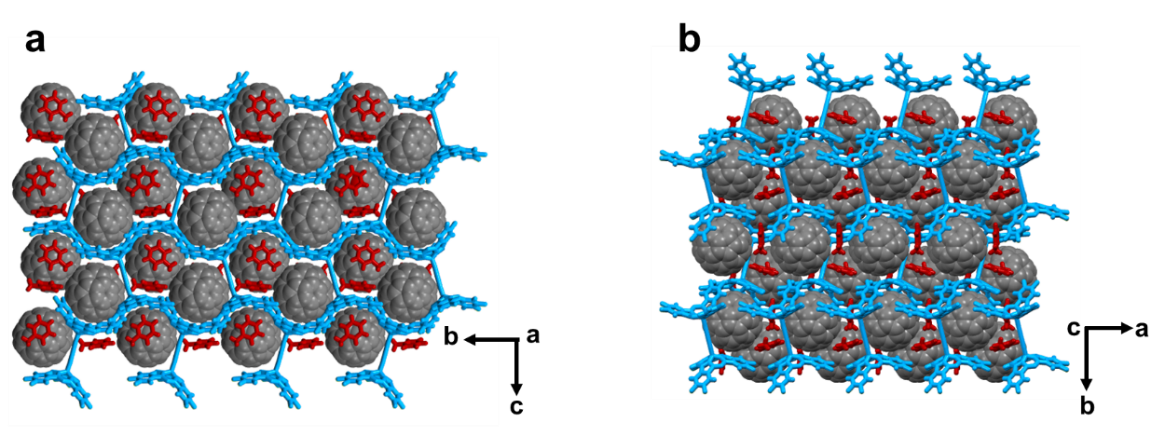
**

**Figure S8.** The view from a) a-axis and b) c-axis of **2DiSubPc-C60** crystal.

**
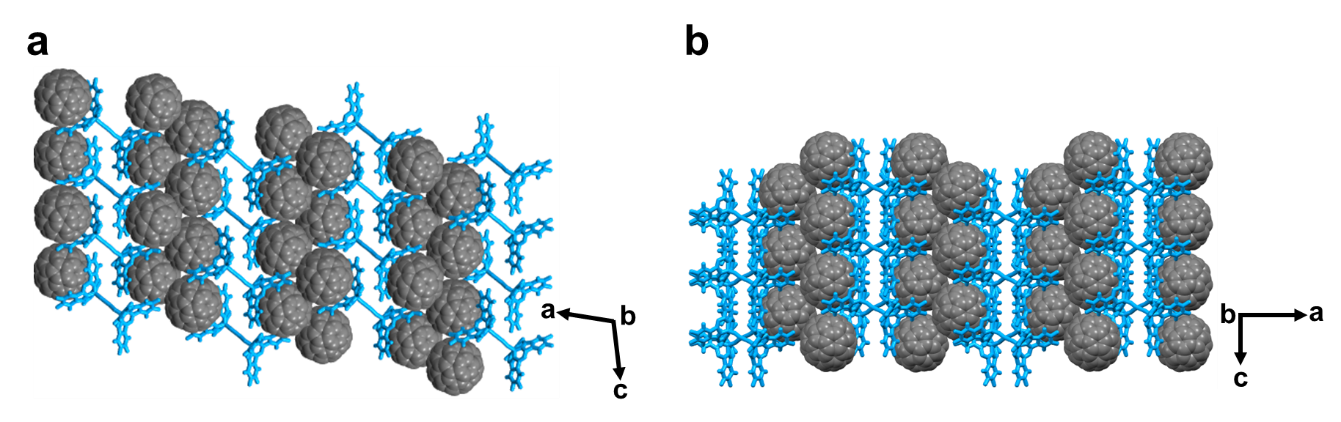
**

**Figure S9.** The view from a) a-axis and b) b-axis of **2DiSubPc-C70** crystal.

**Table S2.** Crystallographic data of **2DiSubPc**, **2DiSubPc-C60** and **2DiSubPc-C70**

| Crystals | **2DiSubPc** | **2DiSubPc-C60** | **2DiSubPc-C70** |
| --- | --- | --- | --- |
| Crystal System | Trigonal | Monoclinic | Monoclinic |
| Crystal Symmetry | *D*3d | *C*2h | *C*s |
| Space Group | *R*c | *P*21/n | *C*c |
| a [Å] | 13.3772(11) | 13.238(2) | 49.716(8) |
| b [Å] | 13.3772(11) | 25.513(3) | 11.0347(16) |
| c [Å] | 41.769(6) | 17.776(2) | 21.540(4) |
| α [ °] | 90 | 90 | 90 |
| β [ °] | 90 | 92.285(5) | 103.506(8) |
| γ [ °] | 120 | 90 | 90 |
| V [Å3] | 6473.14 | 5998.91 | 11490.1 |
| R [%] | 9.59 | 13.35 | 23.67 |
| Rw [%] | 6.18 | 21.71 | 25.31 |
| B-B Distance [Å] | 6.96 | 6.95 | 6.90 |
| Fullerene-SubPc Distance [Å] | - | 3.15 3.20 3.37  3.15 3.20 3.37 | 3.03 3.14 3.31  3.13 3.18 3.26 |

## Theoretical calculations


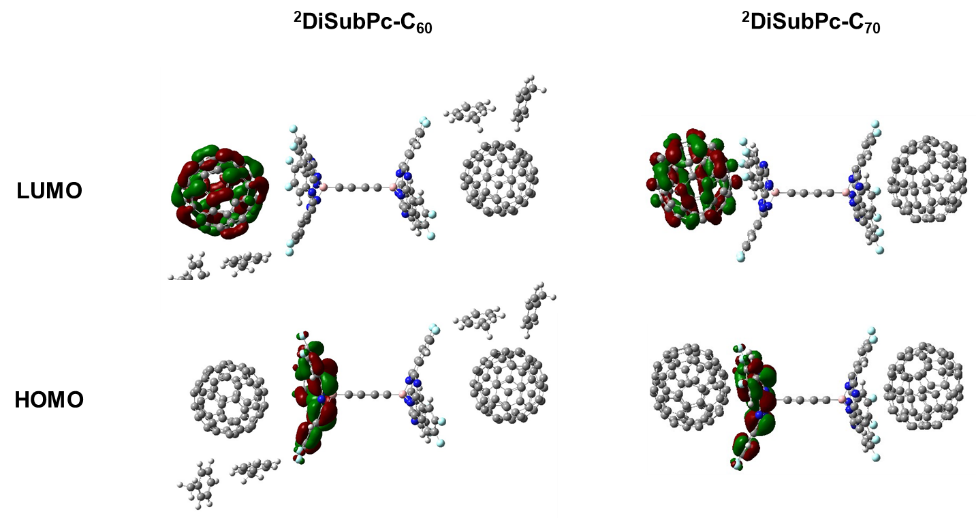


**Figure S10.** Calculated FMO distributions of **2DiSubPc-C60** and **2DiSubPc-C70**.

## Photophysical properties


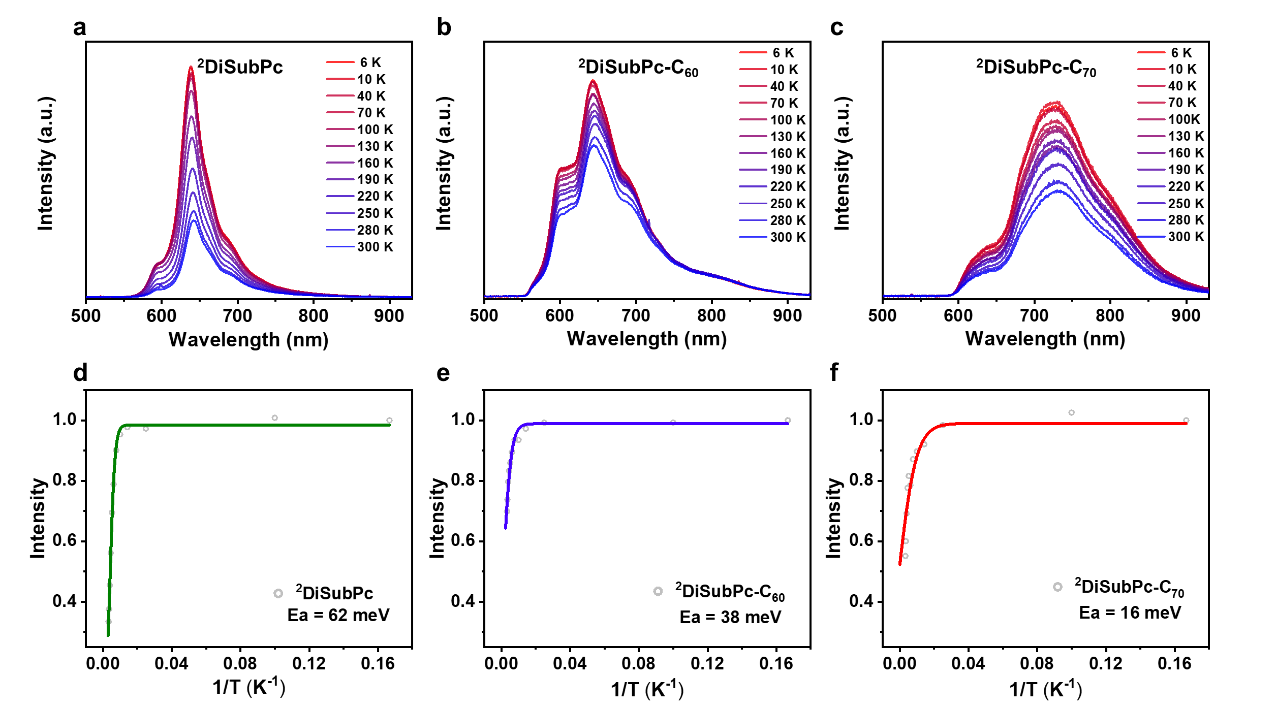


**Figure S11.** a-c)The temperature-dependent PL spectra from 6 K to300 K, d-f) The corresponding integral of fluorescence intensity (black dots) employed for linear fitting, with the fitting curve and obtained activation energy displayed.

()

In the equation, *I*(T) and *I*0 refer to photoluminescence intensity of **2DiSubPc-C70**in specific temperature and low temperature, A is the ratio factor, *E*a is the activation energy of nonradiative process, kB is the Boltzmann constant and T is the specific temperature.

**Table S3.** The PL lifetime of **2DiSubPcs**, **2DiSubPcs-C60** and **2DiSubPcs-C70** in 300 K.

| Samples | **2DiSubPc** | **2DiSubPc-C60** | **2DiSubPc-C70** |
| --- | --- | --- | --- |
| A1 | 100% | 100% | 15.5% |
| τ1 (ns) | 1.12 | 0.89 | 0.73 |
| A2 | - | - | 84.5% |
| τ2 (ns) | - | - | 4.96 |

## Photothermal conversion

**Table S4.** The photothermal properties of **2DiSubPcs-C70** compared with previous organic solids in the literature.

| Samples | Increased temperature (℃)/light intensity  (W cm-2) | Normalized increased temperature (℃) in 0.5 Wcm-2 [a] | References |
| --- | --- | --- | --- |
| **2DiSubPc-C70** | 213/0.5 | 213 | This work |
| TCNQ-Tp-Py | 130/0.9 | 72 | *Angew. Chem. Int. Ed.* **2025**, *64*, e202413805 |
| CF cocrystals | 60/0.276 | 109 | *ACS. Nano*. **2022**, *16*, 15000 |
| TAHC | 60/0.5 | 60 | *Angew. Chem. Int. Ed.* **2022**, *134*, e202202571 |
| TPP-2IND | 160/0.9 | 89 | *Aggregate* **2024**, *5*, e535 |
| DDPA-PDN | 114/0.8 | 71 | *Adv. Funct. Mater.* **2021**, *31*, 2106247 |
| FCDTDPP | 100/0.5 | 100 | *Angew. Chem. Int. Ed.* **2025**, *64*, e202418047 |
| GDPA-QCN | 30/0.1 | 150 | *Angew. Chem. Int. Ed.* **2022,** *61,* e202117087 |
| COF-Azu-TP | 200/1 | 100 | *Small* **2024,** *20,* 2307635 |
| P(DPP)4 | 115/0.8 | 72 | *Dyes and Pigments* **2021,** *192,* 109460 |
| PPBBT | 48/0.8 | 30 | *Nat. Commun.* **2019,** *10,* 1192 |
| CR-TPE-T | 100/0.8 | 63 | *Adv. Mater.* **2022,** *34,* 2108048 |
| CR-DPA-T | 110/0.8 | 69 | *Adv. Mater.* **2020,** *32,* 1908537 |

[a] Assuming a linear correlation between the added temperature and light intensity, we give the value of the normalized temperature raise for these materials irradiated with the light of 0.5 W cm−2.

## References

(1).(a) Afraj, S. N., Jiang, B. H., Su, Y. W., Yang, C. H., Shih, H. S., Velusamy, A., Ni, J. S., Ezhumalai, Y., Su, T. Y., Liu, C. L., Yau, S., Chen, C. P., Chen, M. C., Dicyclopentadithienothiophene-based non-fullerene acceptors for ternary blend organic photovoltaics. *J. Mater. Chem. C.* **2024,** *12*, 2247-2257; (b) Bukuroshi, E., Vestfrid, J., Gross, Z., Bender, T. P., Fluorinated boron subphthalocyanines: Lewis acid based templating chemistry facilitates random halide exchange, and fluoride *versus* chloride affects the basic photophysical properties and the solid-state arrangement. *New. J. Chem.* **2019,** *43*, 16730-16737; (c) Bukuroshi, E., Petersen, A. U., Brolos, L., Bender, T. P., Nielsen, M. B., Exploring the synthesis and electronic properties of axially substituted boron subphthalocyanines with carbon-based functional groups. *Eur. J. Inorg. Chem.* **2020,** *2020*, 3481-3495.

## 1H and 13C NMR spectra


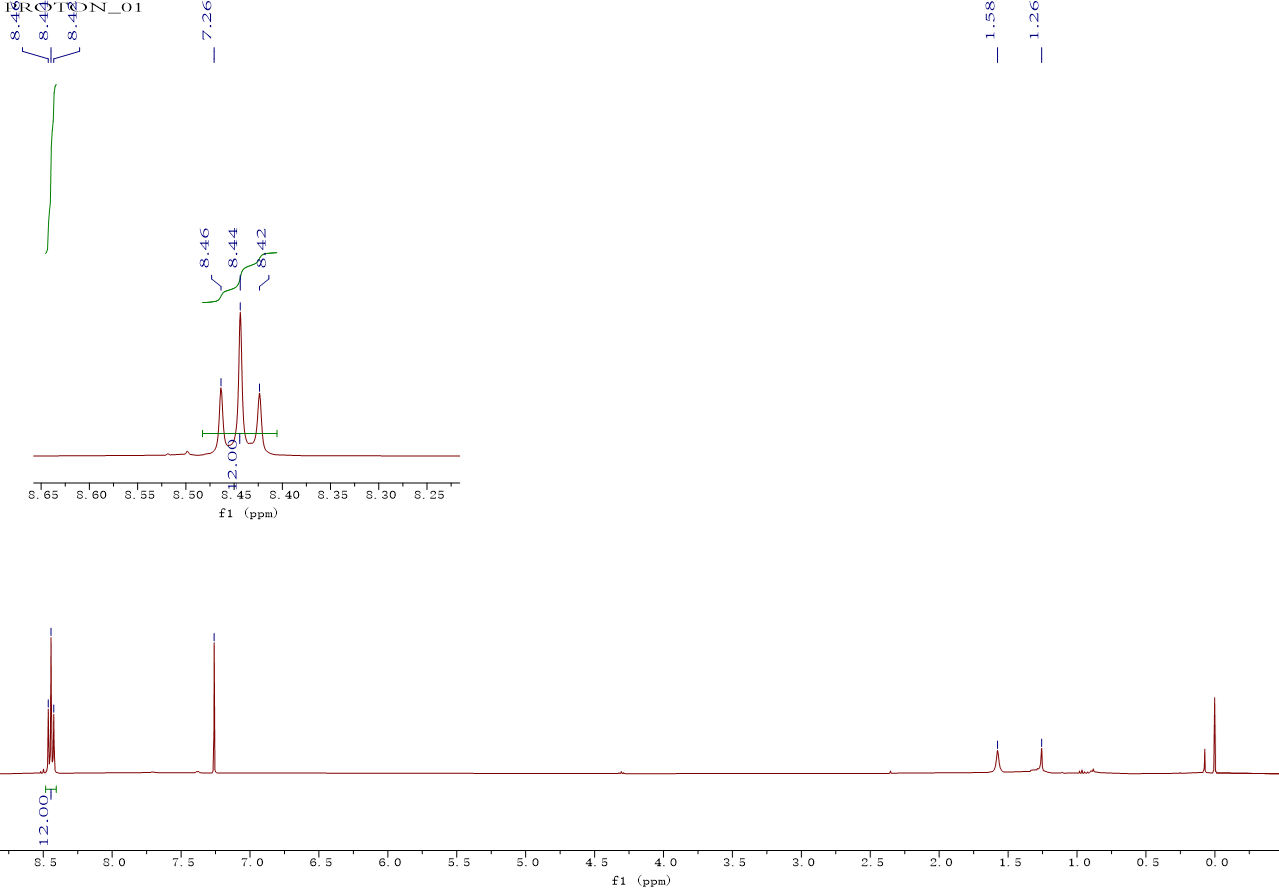


**Figure S12.** 1H-NMR and 13C-NMR spectra of **2DiSubPc**


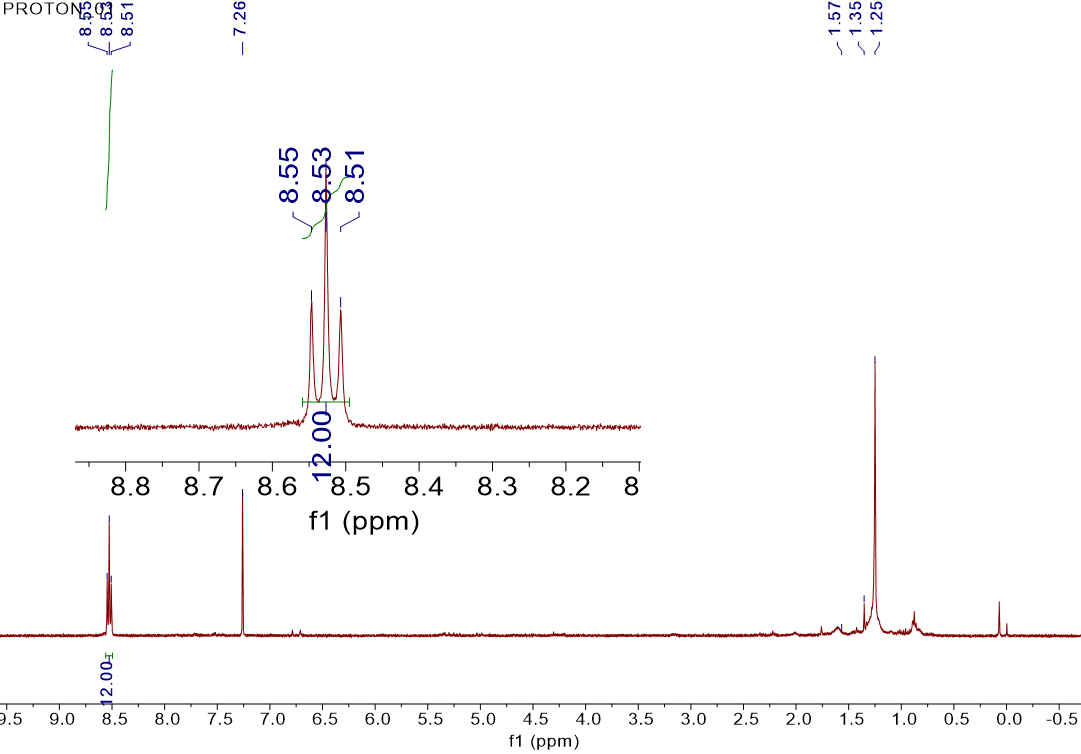


**Figure S13.** 1H-NMR and 13C-NMR spectra of **4DiSubPc**
